# Supplementary material for: Chronic disaster impact: the long-term psychological and physical health consequences of housing damage due to induced earthquakes
Source: PubMed Central journal article supplement (PMC8103378; doi:10.1136/bmjopen-2020-040710), 2021-05-05
Supplement: bmjopen-2020-040710supp001.pdf [file bmjopen-2020-040710supp001.pdf]

## Supplementary materials

## Seismicity in the Groningen gasfield

Figure S1: Number of earthquakes and volume of gas production in the Groningen gasfield:

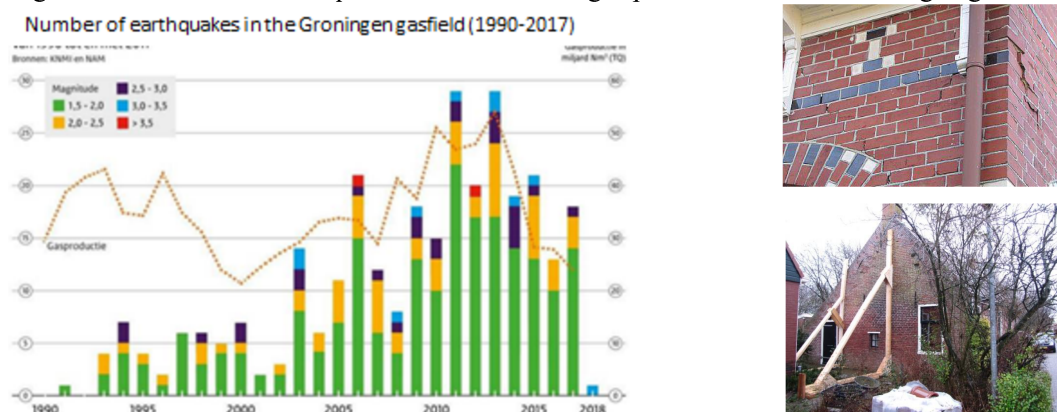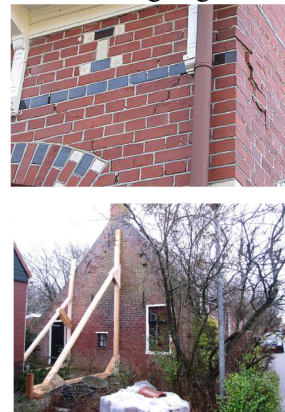

The volume of gas production in the subsoil of Groningen is presented as a dotted line in Figure 2. The number of earthquakes magnitude 2 or higher increased from 2003 onwards. The earthquake of August 2012 in the village of Huizinge (magnitude 3,6 on Richter scale) was a landmark event that caused unrest and great concern among the population in the province of Groningen. It was the heaviest earthquake measured in the province. The magnitude of earthquakes is recorded by the Dutch national borehole network, the regional accelerometer network and all additional seismic stations in the south of the Netherlands. European seismic stations reported the event at epicentral distances up to 800 km (Dost and Kraaijpoel, 2012).

410,000 residents of the province of Groningen are exposed to these induced earthquakes: they live in a postcode area where damage has been recognized by the oil company responsible (NAM, a joint venture of Shell and Exxon). Of these, 134,363 adults report having damage to their property (Postmes et al., 2017). Of these 68,343 report having damage multiple times.

Looking worldwide, there are 1174 locations in which induced seismicity is taking place. 11% of seismicity is due to conventional oil or gas extraction (see [inducedearthquakes.org/](http://inducedearthquakes.org/))

## References

- Dost B and Kraaijpoel D. The August 16, 2012 earthquake near Huizinge in Groningen province. Royal Dutch Meteorological Institute, 2013.
- Postmes, T., Stroebe, K., Richardson, J., LeKander, B., Oldersma, F., Broer, J. & Greven, F. (2018). Gevolgen van bodembeweging voor Groningers: Ervaren veiligheid, gezondheid en toekomstperspectief 2016-2017. Groningen: Heymans Instituut, Rijksuniversiteit Groningen.

Table S1

*Demographic characteristics of participants completing separate measurements per level of damage: total sample size, mean age, distribution of level of education, distribution of level of damage, distribution of gender, and amount of participants that completed the health measures. Netherlands 2016-2017*

| Damage to house at T1 |                                    | T1<br>Feb '16 | T2<br>June '16 | T3<br>Nov '16 | T4<br>Apr '17 | T5<br>Nov '17 |     |
|-----------------------|------------------------------------|---------------|----------------|---------------|---------------|---------------|-----|
| None                  | Total N                            | 1477          | 1166           | 968           | 886           | 801           |     |
|                       | Age (mean)                         | 57.67         | 59.13          | 59.13         | 60.28         | 61.48         |     |
|                       | Level of education (N)             | Low           | 430            | 340           | 266           | 267           | 238 |
|                       |                                    | Middle        | 460            | 351           | 290           | 255           | 226 |
|                       |                                    | High          | 562            | 453           | 396           | 349           | 324 |
|                       | Gender (N)                         | Male          | 794            | 621           | 515           | 471           | 427 |
|                       |                                    | Female        | 683            | 545           | 453           | 415           | 374 |
|                       | Perceived health (N)               | 1467          | -              | 934           | 835           | 784           |     |
|                       | Stress related health symptoms (N) | 1452          | -              | 937           | 836           | 780           |     |
|                       | Mental health (N)                  | 1432          | 1048           | 920           | 828           | 769           |     |
| One time              | Total N                            | 913           | 730            | 608           | 559           | 490           |     |
|                       | Age (mean)                         | 58.32         | 58.87          | 58.81         | 60.06         | 60.86         |     |
|                       | Level of education (N)             | Low           | 237            | 191           | 155           | 143           | 131 |
|                       |                                    | Middle        | 295            | 235           | 195           | 182           | 159 |
|                       |                                    | High          | 363            | 295           | 250           | 227           | 193 |
|                       | Gender (N)                         | Male          | 505            | 398           | 345           | 323           | 279 |
|                       |                                    | Female        | 407            | 332           | 263           | 236           | 211 |
|                       | Perceived health (N)               | 907           | -              | 587           | 521           | 464           |     |
|                       | Stress related health symptoms (N) | 894           | -              | 584           | 522           | 463           |     |
|                       | Mental health (N)                  | 895           | 666            | 581           | 517           | 456           |     |
| Multiple              | Total N                            | 1057          | 825            | 704           | 609           | 558           |     |
|                       | Age (M)                            | 54.06         | 55.57          | 55.60         | 56.71         | 57.70         |     |
|                       | Level of education (N)             | Low           | 215            | 168           | 133           | 120           | 110 |
|                       |                                    | Middle        | 381            | 289           | 246           | 213           | 188 |
|                       |                                    | High          | 445            | 356           | 315           | 268           | 253 |
|                       | Gender (N)                         | Male          | 493            | 385           | 323           | 284           | 269 |
|                       |                                    | Female        | 563            | 440           | 381           | 325           | 289 |
|                       | Perceived health (N)               | 1048          | -              | 683           | 578           | 537           |     |
|                       | Stress related health symptoms (N) | 1041          | -              | 675           | 577           | 530           |     |
|                       | Mental health (N)                  | 1018          | 739            | 674           | 570           | 528           |     |

Table S2

*Unstandardized regression parameter estimates and standard errors for the association between time, damage, and the interaction between time and damage on perceived health, stress-related health symptoms, and mental health, and the interaction between gender and damage on perceived health, stress-related health symptoms, and mental health – adjusted for gender, age, level of education and ground motion (cumulative PGA). Netherlands 2016-2017.*

|                             | Perceived health    | Stress-related health symptoms <sup>1</sup> | Mental health      |
|-----------------------------|---------------------|---------------------------------------------|--------------------|
| Gender                      | -0.07<br>(0.04)     | -5.08***<br>(0.75)                          | -2.81***<br>(0.70) |
| Age                         | -0.01***<br>(0.001) | -0.02<br>(0.02)                             | 0.07***<br>(0.02)  |
| Level of education (middle) | 0.08*<br>(0.03)     | 0.62<br>(0.67)                              | 0.99<br>(0.62)     |
| Level of education (high)   | 0.23***<br>(0.03)   | 3.03***<br>(0.63)                           | 2.92***<br>(0.59)  |
| Cumulative PGA              | -0.001<br>(0.004)   | 0.03<br>(0.09)                              | -0.01<br>(0.08)    |
| Time                        | -0.01<br>(0.01)     | -0.25*<br>(0.13)                            | -0.49***<br>(0.15) |
| Damage (one time)           | -0.02<br>(0.04)     | -0.19<br>(0.93)                             | -0.05<br>(0.81)    |
| Damage (multiple)           | -0.14**<br>(0.04)   | -4.04***<br>(0.95)                          | -3.79***<br>(0.84) |
| Time * Damage (one time)    | -0.02<br>(0.01)     | -0.13<br>(0.20)                             | -0.07<br>(0.24)    |
| Time * Damage (multiple)    | -0.03***<br>(0.01)  | -0.45*<br>(0.19)                            | -0.60**<br>(0.23)  |
| Gender * Damage (one time)  | 0.03<br>(0.06)      | -0.58<br>(1.21)                             | -0.51<br>(1.13)    |
| Gender * Damage (multiple)  | 0.04<br>(0.05)      | -0.55<br>(1.15)                             | 0.85<br>(1.07)     |
| Constant                    | 3.87***<br>(0.03)   | 80.04***<br>(0.73)                          | 77.86***<br>(0.65) |
| Observations                | 10,256              | 9,100                                       | 9,686              |
| Log Likelihood              | -10,104.34          | -36,204.85                                  | -38,019.84         |
| Akaike Inf. Crit.           | 20,242.68           | 72,443.70                                   | 76,073.68          |
| Bayesian Inf. Crit.         | 20,365.69           | 72,564.67                                   | 76,195.71          |

Note. \*p<0.05; \*\*p<0.01; \*\*\*p<0.001

1. Stress-related health symptoms were reverse-coded such that higher levels indicate less stress
